# Supplementary material for: Effects of clozapine-N-oxide and compound 21 on sleep in laboratory mice
Source: eLife. 2023 Mar 9;12:e84740. doi: 10.7554/eLife.84740 (PMC9998087; doi:10.7554/eLife.84740)
Supplement: Supplementary file 4. [file elife-84740-supp4.docx]

**Supplementary Table 4: ANOVA results for EEG spectra following CNO and saline injections**

| Vigilance state | Conditions | Time window | Main effect | *F* | *p* |
| --- | --- | --- | --- | --- | --- |
| **Wake** |  |  |  |  |  |
|  | 1 mg/kg vs. saline | 2 hours | ‘condition’ | *F*(1,5) = 0.06176 | 0.8136 |
| ‘frequency’ x ‘condition’ | *F*(118,590) = 1.137 | 0.1720 |
| 6 hours | ‘condition’ | *F*(1,5) = 0.03580 | 0.8574 |
| ‘frequency’ x ‘condition’ | *F*(118,590) = 0.6646 | 0.9966 |
| 5 mg/kg vs. saline | 2 hours | ‘condition’ | *F*(1,9) = 0.7492 | 0.4092 |
| ‘frequency’ x ‘condition’ | *F*(118,1062) = 0.5995 | 0.9997 |
| 6 hours | ‘condition’ | *F*(1,9) = 0.0006565 | 0.9801 |
| ‘frequency’ x ‘condition’ | *F*(118,1062) = 0.9777 | 0.5507 |
| 10 mg/kg vs. saline | 2 hours | ‘condition’ | *F*(1,7) = 4.602 | 0.0691 |
| ‘frequency’ x ‘condition’ | *F*(118, 826) = 0.8017 | 0.9344 |
| 6 hours | ‘condition’ | *F*(1,7) = 3.232 | 0.1153 |
| ‘frequency’ x ‘condition’ | *F*(118, 826) = 1.130 | 0.1778 |
| **NREM** |  |  |  |  |  |
|  | 1 mg/kg vs. saline | 2 hours | ‘condition’ | *F*(1,5) = 0.1893 | 0.6816 |
| ‘frequency’ x ‘condition’ | *F*(118,590) = 0.8900 | 0.7805 |
| 6 hours | ‘condition’ | *F*(1,5) = 0.1227 | 0.7404 |
| ‘frequency’ x ‘condition’ | *F*(118,590) = 0.9481 | 0.6329 |
| 5 mg/kg vs. saline | 2 hours | ‘condition’ | *F*(1,9) = 17.80 | 0.0022 |
| ‘frequency’ x ‘condition’ | *F*(118,1062) = 10.83 | <0.0001 |
| 6 hours | ‘condition’ | *F*(1,9) = 10.99 | 0.0090 |
| ‘frequency’ x ‘condition’ | *F*(118, 1062) = 4.726 | <0.0001 |
| 10 mg/kg vs. saline | 2 hours | ‘condition’ | *F*(1,7) = 13.01 | 0.0087 |
| ‘frequency’ x ‘condition’ | *F*(118, 826) = 5.798 | <0.0001 |
| 6 hours | ‘condition’ | *F*(1,7) = 12.30 | 0.0099 |
| ‘frequency’ x ‘condition’ | *F*(118, 826) = 7.274 | <0.0001 |
| **REM** |  |  |  |  |  |
|  | 1 mg/kg vs. saline | 2 hours | ‘condition’ | *F*(1,4) = 1.232 | 0.3292 |
| ‘frequency’ x ‘condition’ | *F*(118,472) = 0.9809 | 0.5410 |
| 6 hours | ‘condition’ | *F*(1,5) = 6.219 | 0.0549 |
| ‘frequency’ x ‘condition’ | *F*(118,590) = 1.372 | 0.0100 |
| 5 mg/kg vs. saline | 2 hours | ‘condition’ | *F*(1,8) = 3.119 | 0.1154 |
| ‘frequency’ x ‘condition’ | *F*(118,944) = 0.7339 | 0.9828 |
| 6 hours | ‘condition’ | *F*(1,9) = 1.966 | 0.1944 |
| ‘frequency’ x ‘condition’ | *F*(118, 1062) = 1.229 | 0.0574 |
| 10 mg/kg vs. saline | 2 hours | ‘condition’ | *F*(1,7) = 0.007106 | 0.9352 |
| ‘frequency’ x ‘condition’ | *F*(118, 826) = 1.298 | 0.0243 |
| 6 hours | ‘condition’ | *F*(1,7) = 0.0002323 | 0.9883 |
| ‘frequency’ x ‘condition’ | *F*(118, 826) = 2.327 | <0.0001 |
